# Supplementary material for: A cationic radical metal–organic framework enabling low water evaporation enthalpy and high photothermal conversion efficiency for solar-driven water purification
Source: Royal Society of Chemistry journal article supplement (doi:10.1039/d4ta01126k), 2024-01-01
Supplement: d4ta01126k1.pdf [file d4ta01126k1.pdf]

## Supporting Information

### **Cationic Radical Metal–Organic Framework Enabling Low Water Evaporation Enthalpy and High Photothermal Conversion Efficiency for Solar-Driven Water Purification**

Zi-Yu Wang,<sup>ab‡</sup>Rui Wang,<sup>a‡</sup>Hannah M. Johnson,<sup>c</sup>Lei Cai,<sup>a</sup>An-An Zhang,<sup>a</sup>Qiang Zhang<sup>\*c</sup> and Tian-Fu Liu<sup>\*a</sup>

<sup>a</sup>State Key Laboratory of Structural Chemistry, Fujian Institute of Research on the Structure of Matter, Chinese Academy of Sciences Fuzhou, Fujian 350108, China. E-mail: [tfliu@fjirsm.ac.cn](mailto:tfliu@fjirsm.ac.cn)

<sup>b</sup>College of Chemistry, Fuzhou University, Fuzhou, Fujian 350002, PR China.

<sup>c</sup>Department of Chemistry, Washington State University, Pullman, WA 99163, United States. E-mail: [q.zhang@wsu.edu](mailto:q.zhang@wsu.edu)

‡ These authors contributed equally to this work.

## content

|                                                              |    |
|--------------------------------------------------------------|----|
| S1 Materials and instrumentation .....                       | 3  |
| S2 Experimental Procedures.....                              | 3  |
| S3 Structural Characterizations of PFC-771 .....             | 6  |
| S4 Structural Characterizations of PFC-771 film by EPD. .... | 9  |
| S5 Photothermal Conversion Measurement. ....                 | 10 |
| S6 Solar-Driven Interfacial Water Evaporation. ....          | 12 |
| S7 Calculation.....                                          | 16 |
| <b>References :</b> .....                                    | 19 |

## S1 Materials and instrumentation

Unless otherwise mentioned, all reagents and solvents were purchased from commercial sources including  $\text{NiCl}_2 \cdot 6\text{H}_2\text{O}$ , ethanol (EtOH), Acetonitrile ( $\text{CH}_3\text{CN}$ ), N,N-dimethylformamide (DMF), Acetone, 4, 4'-Bipyridine, 2, 4-Dinitrochlorobenzene, 1H-Pyrazol-4-amine, They were used as received without further purification.

The PXRD patterns were recorded by Rigaku Smartlab with grazing-incidence X-ray diffraction (GIXRD) mode.  $^1\text{H}$ -NMR spectra were recorded on Bruker AVANCE III 400MHz spectrometers spectrometer. Electron paramagnetic resonance (EPR) measurements were performed at X-band~9.8 (GHz) using a Bruker Bruker-BioSpin EPR spectrometer at room temperature. The contact angle between the absorber and water was calculated by means of a dynamic contact angle tester (Theta lite). Thermal Gravimetric Analysis (TGA) was performed on a Seiko S-II instrument where the dried crystalline samples were heated at a rate of  $5^\circ\text{C}/\text{min}$  up to  $900^\circ\text{C}$  and then cooled to room temperature under  $\text{N}_2$  atmosphere. Differential scanning calorimetry (DSC) were tested on DSC2-01486: samples were heated from  $30^\circ\text{C}$  at a rate of  $20^\circ\text{C}/\text{min}$  up to  $150^\circ\text{C}$  and then cooled to  $30^\circ\text{C}$  at a rate of  $10^\circ\text{C}/\text{min}$  under  $\text{N}_2$  atmosphere. Optical diffuse reflectance spectra were measured at room temperature using a PerkinElmer Lambda-900 UV-Vis-NIR diffusion reflectance spectroscopy (DRS) equipped with an integrating sphere. A  $\text{BaSO}_4$  plate was used as a reference for sample measurements. Infrared (IR) thermal images were recorded by HIKMICRO thermographic handheld professional camera. X-ray photoelectron spectroscopy (XPS) measurements were performed on a Thermo ESCALAB 250 spectrometer, using non-monochromatic  $\text{Al K}\alpha$  X-ray as the excitation source. The obtained data were analyzed by CaSa XPS software with choosing C 1s ( $284.8\text{ eV}$ ) as the reference line to compensate for surface-charging effects. Inductively coupled plasma spectroscopy (ICP) was measured by HORIBA Jobin Yvon Ultima2.

## S2 Experimental Procedures

### Synthesis of BPZV

The ligand BPZV was prepared by a literature method with improvement, as shown in Scheme S1. Firstly, 2,4-Dinitrochlorobenzene (7.0 g, 35 mmol) and 4,4'-Bipyridine (1.6 g, 10 mmol) were dissolved and refluxed in  $\text{CH}_3\text{CN}$  (30 mL). The mixture is stirred together at  $90^\circ\text{C}$  for 72 h, then cooled to room temperature. The suspension was washed several times by centrifugation with  $\text{CH}_3\text{CN}$  and acetone, and dry at  $80^\circ\text{C}$  for 24 h, light yellow powder

(1,1'-bis(2,4-dinitrophenyl)-[4,4'-bipyridine]-1,1'-dium dichloride) (TNV) was obtained. Secondly, TNV (600 mg, 1.7 mmol) and 1H-Pyrazol-4-amine (178 mg, 3.2 mmol) were dissolved and refluxed in EtOH (200 mL). The mixture is stirred at 90°C for 48h, then cooled to room temperature. The suspension was washed several times using centrifugation with EtOH and acetone, and dried at 80°C for 24 h, dark green powder was obtained.

#### **Synthesis of PFC-771**

NiCl<sub>2</sub>·6H<sub>2</sub>O (20 mg) and BPZV (10 mg) in 4 mL of water was ultrasonicated for 5 minutes, followed by addition of 100 μL DMF. The obtained solution was ultrasonicated for additional 5 minutes and transferred to a 25 mL Teflon lined high-pressure reactor. Then, heated in an oven at 130°C for 72 h. Finally, then cooled to room temperature. The obtained brown powder was washed several times by centrifugation with H<sub>2</sub>O and Acetone at 11000 rpm and the precipitate was dried under 80°C.

#### **Fabrication of PFC-771 film by EPD:**

30 mg PFC-771 particles were dispersed in 70 mL DMF/acetone solution by ultrasound for 15 minutes. Then, two identical round-shaped Cu foam connecting with cathodic and anodic electrode with a separation distance of 2 cm were dipped into the above solution, and a dark deposition on negative electrode was distinguished after applying a direct current (DC) voltage of 120 V for 10min (denoted as PFC-771/Cu). Repeat the above process three times to achieve a uniformly distributed film with a thickness of approximately 400 μm.

#### **Gas Sorption Measurements:**

The as-synthesized samples were soaked in acetone for 2 days with the supernatant being replaced by fresh acetone about every 10 h during the process to exchange and remove nonvolatile solvates (DMF). After removal of acetone by centrifugation, the samples were activated under vacuum at room temperature for 6 h and then dried again by using the “degas” function of instruments at 120°C for 10 h prior to gas adsorption. N<sub>2</sub> isotherm measurements were performed at 77K to pressure of 1 bar.

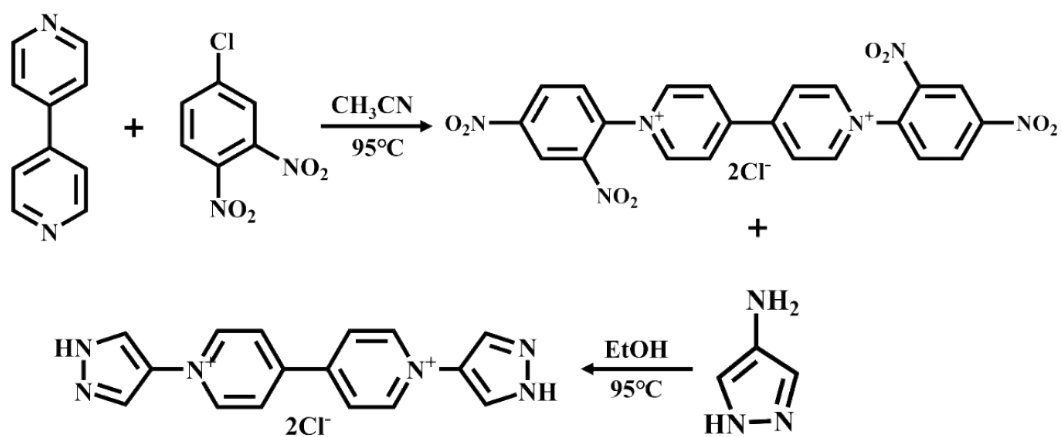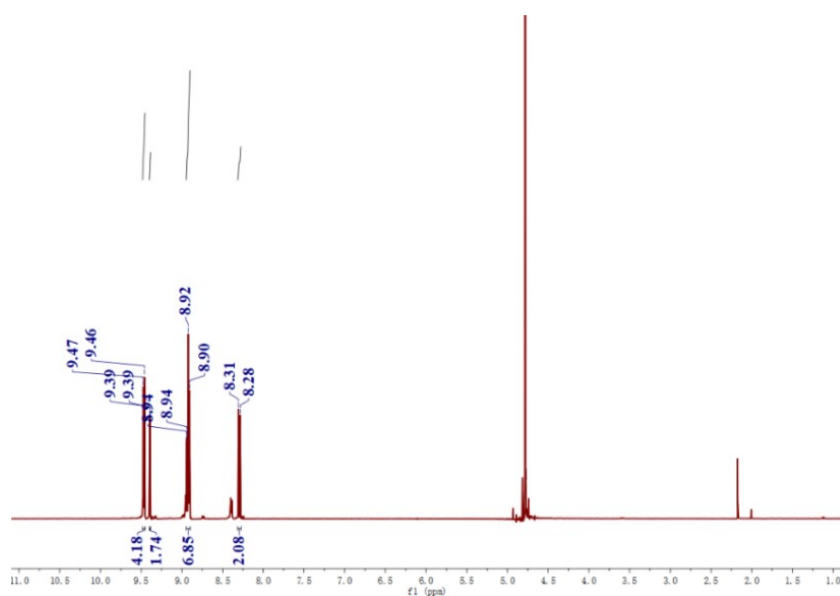

**Figure S1.** The  $^1\text{H}$  NMR (400 MHz,  $\text{D}_2\text{O}$ ) of TNV.  $^1\text{H}$  NMR (400 MHz,  $\text{D}_2\text{O}$ ):  $\delta$ 9.46~9.47 (d, 4H), 9.39 (d, 2H), 8.90~8.94 (m, 6H) and 8.28~8.31 ppm (d, 2H).

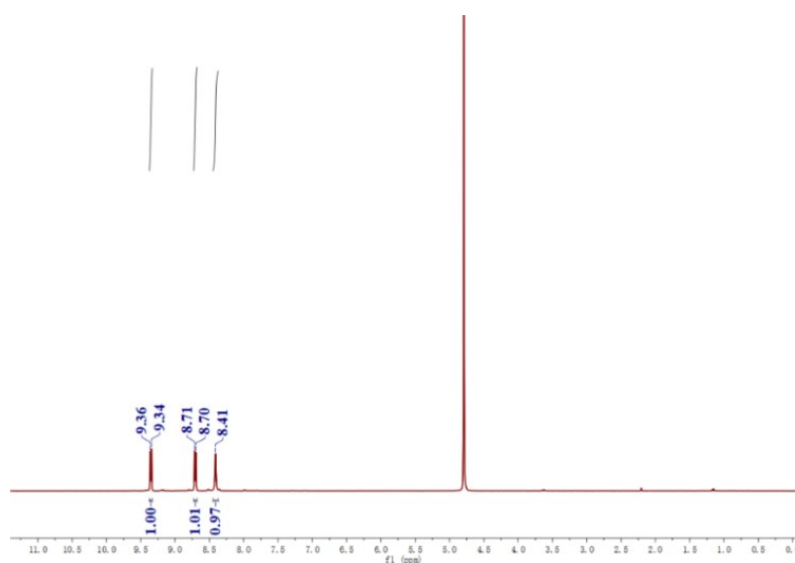

**Figure S2.** The  $^1\text{H}$  NMR (400 MHz,  $\text{D}_2\text{O}$ ) of BPZV.  $^1\text{H}$  NMR (400 MHz,  $\text{D}_2\text{O}$ ):  $\delta$ 9.34~9.36 (d, 4H), 8.70-8.71 (d, 4H) and 8.41 ppm (s, 4H).

### S3 Structural Characterizations of PFC-771

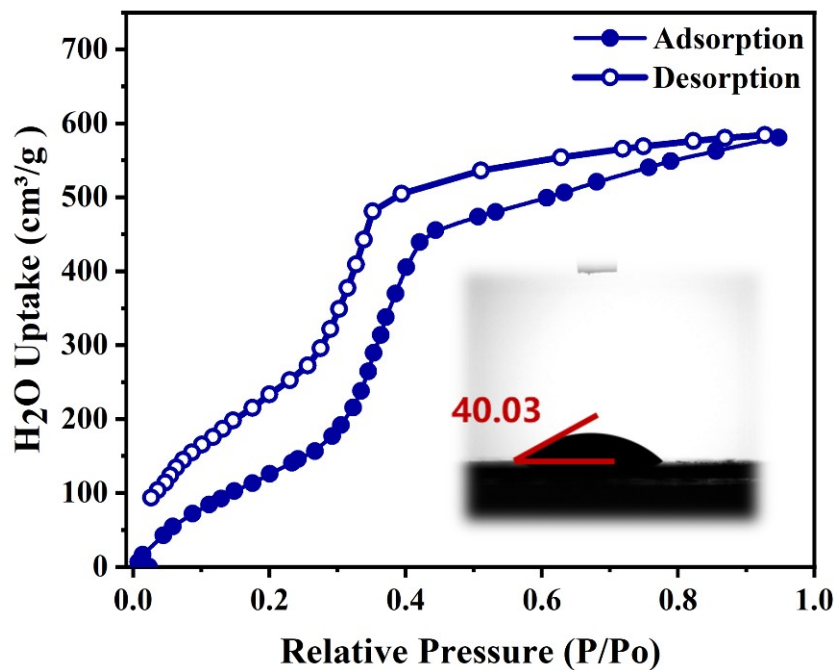

Figure S3. H<sub>2</sub>O isotherm of PFC-771 at 298 K. (inset: Water contact angles of PFC-771)

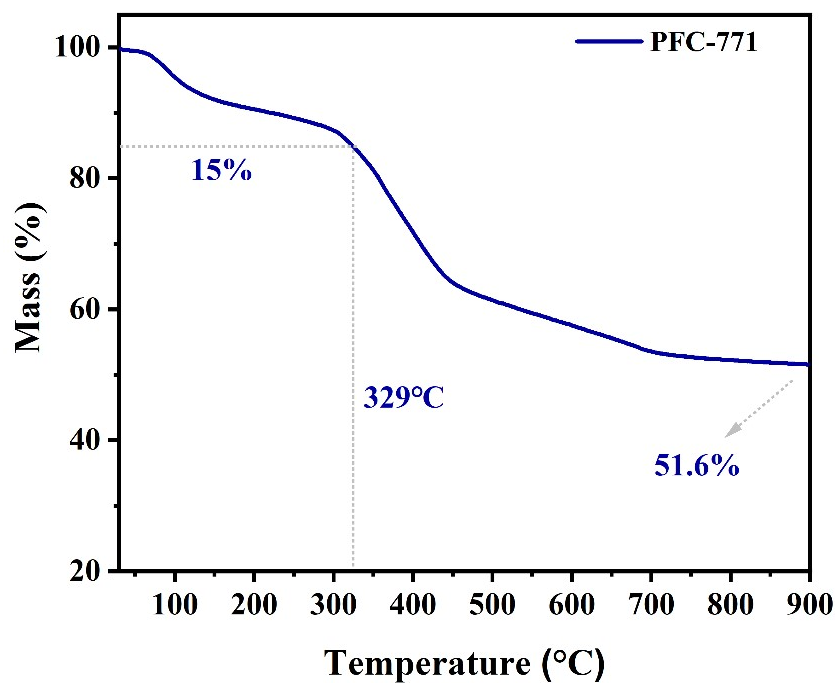

Figure S4. TGA curve of PFC-771.

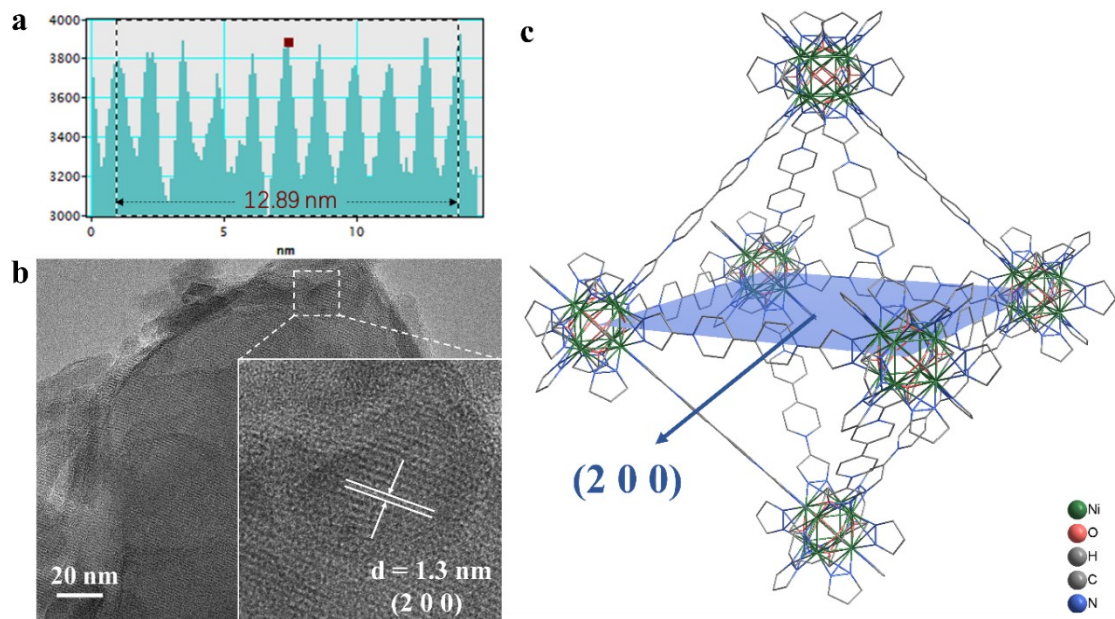

**Figure S5.** (a) FFT image of chosen area. (b) TEM images and the captured lattice fringes image of PFC-771. (c) The view of crystal structures showing the (200) plane of PFC-771.

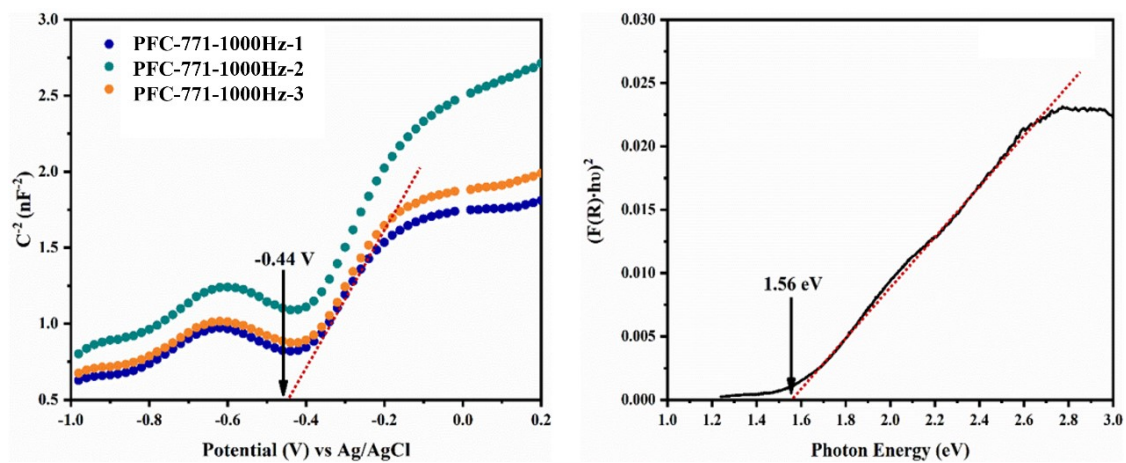

**Figure S6.** (a) Mott-Schottky plots for PFC-771 in 0.2 M  $\text{Na}_2\text{SO}_4$  aqueous solution (b) DRS of PFC-771 and the band gaps deduced from K-M transformation.

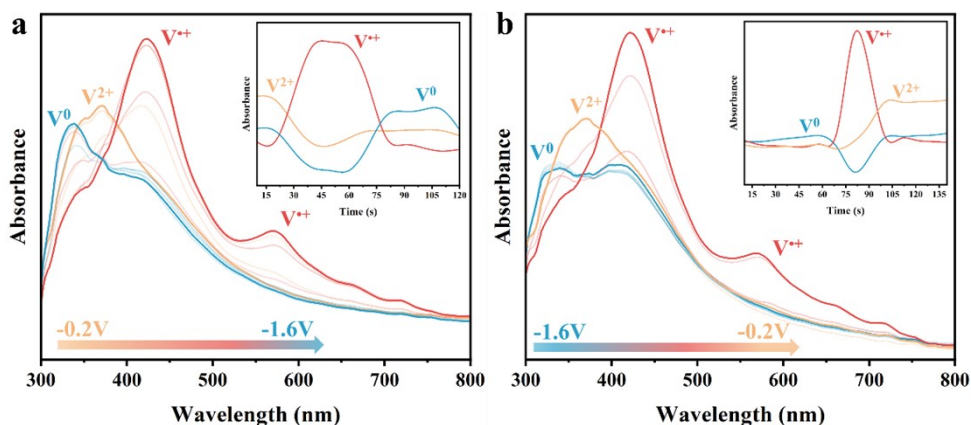

**Figure S7.** Spectroelectrochemical spectra of PFC-771 for electrochemical reduction (carried out from -0.2V to -1.6V) (a) and oxidation (carried out from -1.6V to -0.2V) (b) in 0.2 M  $\text{Na}_2\text{SO}_4$  in intervals of 100 mV.

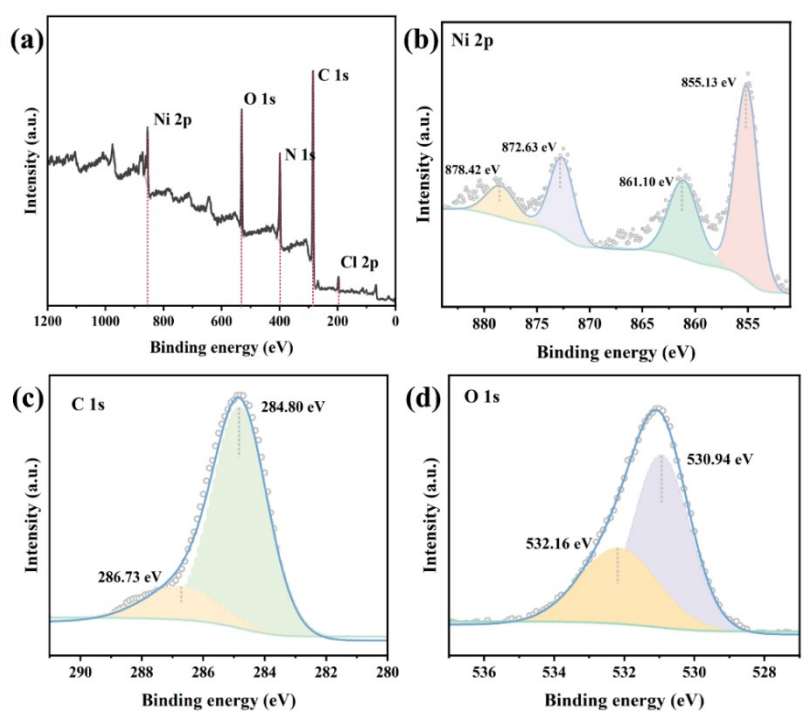

**Figure S8.** A full view of the XPS spectra (a) of PFC-771. (b) the close-ups for Ni 2p peaks. (c) C 1s peaks. and (d) O 1s peaks.

As shown in the XPS survey spectra of the sample, indicating the presence of Ni, O, C, N and Cl. The Ni 2p spectrum exhibits a characteristic doublet with energy peaks at 855.1 and 872.6 eV, corresponding to Ni  $2p_{1/2}$  and Ni  $2p_{3/2}$ , respectively<sup>1</sup>. Figure S7c shows that the C 1s can be deconvoluted into two different C environment corresponding to C-C (294.8 eV) and C=N (286.7 eV) bonds<sup>2</sup>. In the O 1s spectrum of the samples, O exists in the form  $\text{H}_2\text{O}$  (503.9 eV) and O-H (532.1 eV)<sup>3</sup>.



#### S4 Structural Characterizations of PFC-771 film by EPD.

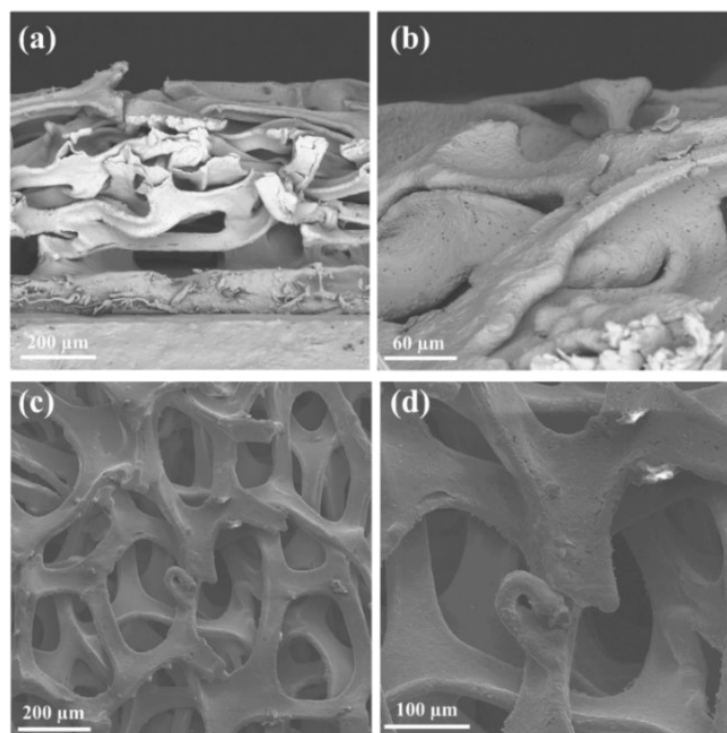

**Figure S9.** SEM images of bare Cu foam (a-b) cross-section SEM images (c-d) top-sectional SEM images.

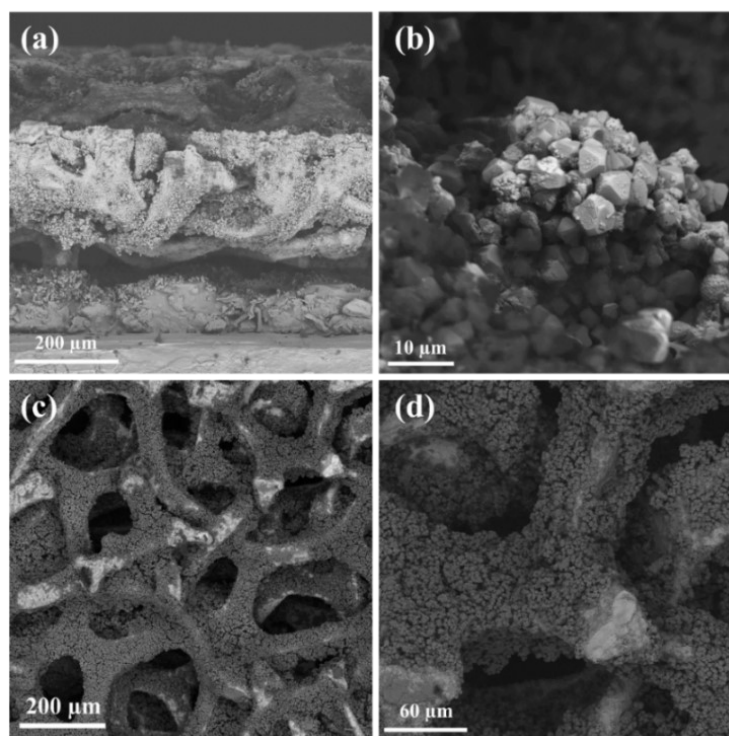

**Figure S10.** SEM images of PFC-771/Cu film (a-b) cross-section SEM images (c-d) top-sectional SEM images.

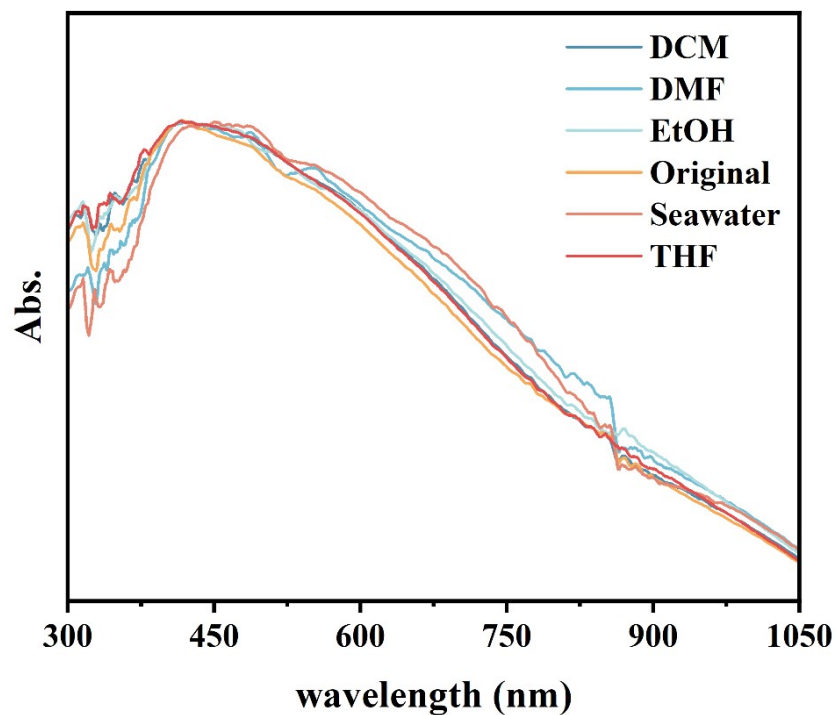

Figure S11. UV-Vis DRS of PFC-771 after immersing in different solvent for 24h.

S5 Photothermal Conversion Measurement.

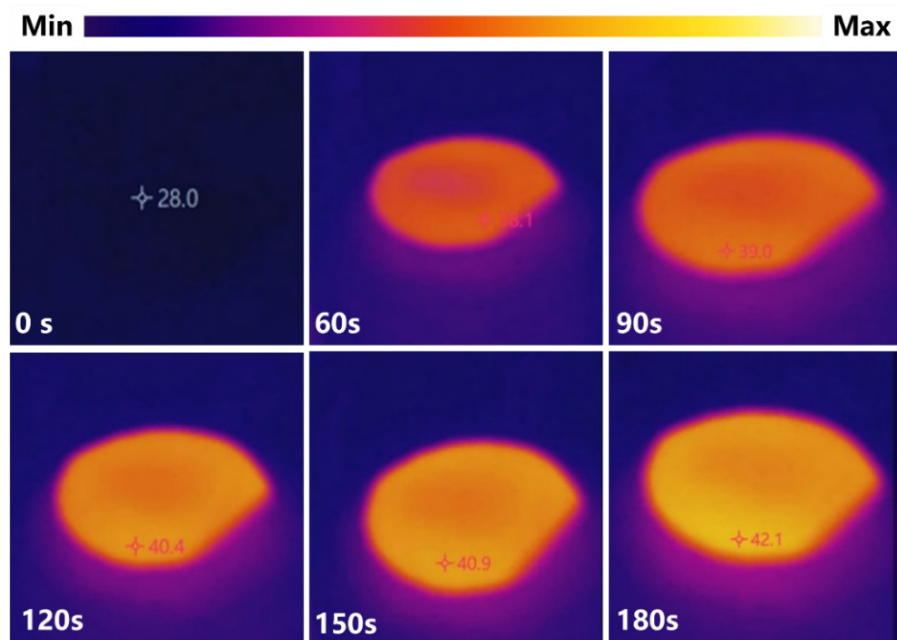

Figure S12. IR images of the PFC-771/Cu film (wet state) as a function of illumination time under one sun illumination.

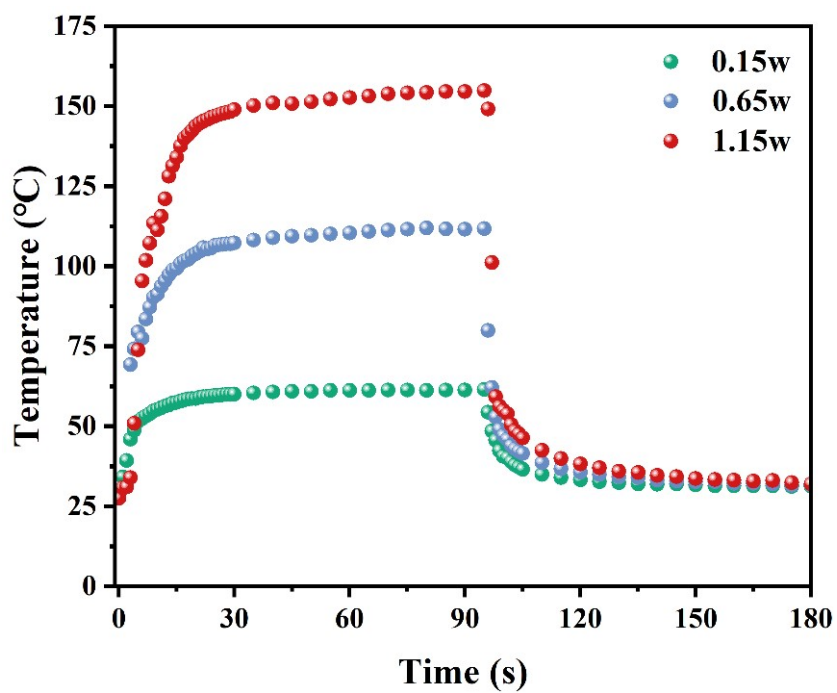

**Figure S13.** Photothermal conversion curves of PFC-771 on quartz glass under 980 nm laser irradiation with different intensities.

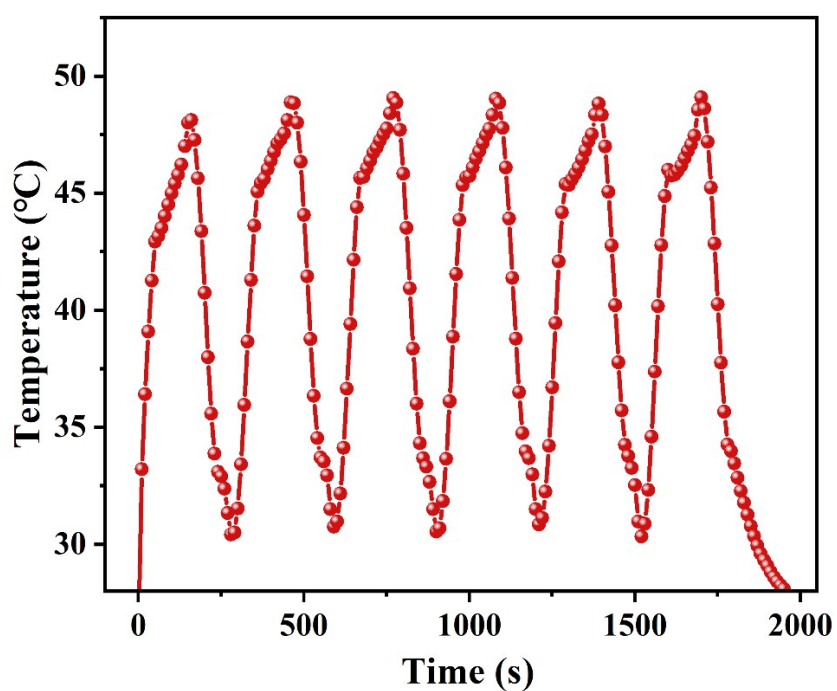

**Figure S14.** The heating and cooling curves of PFC-771 under on/off switch irradiation at  $0.1 \text{ W}\cdot\text{cm}^{-2}$ .

## S6 Solar-Driven Interfacial Water Evaporation.

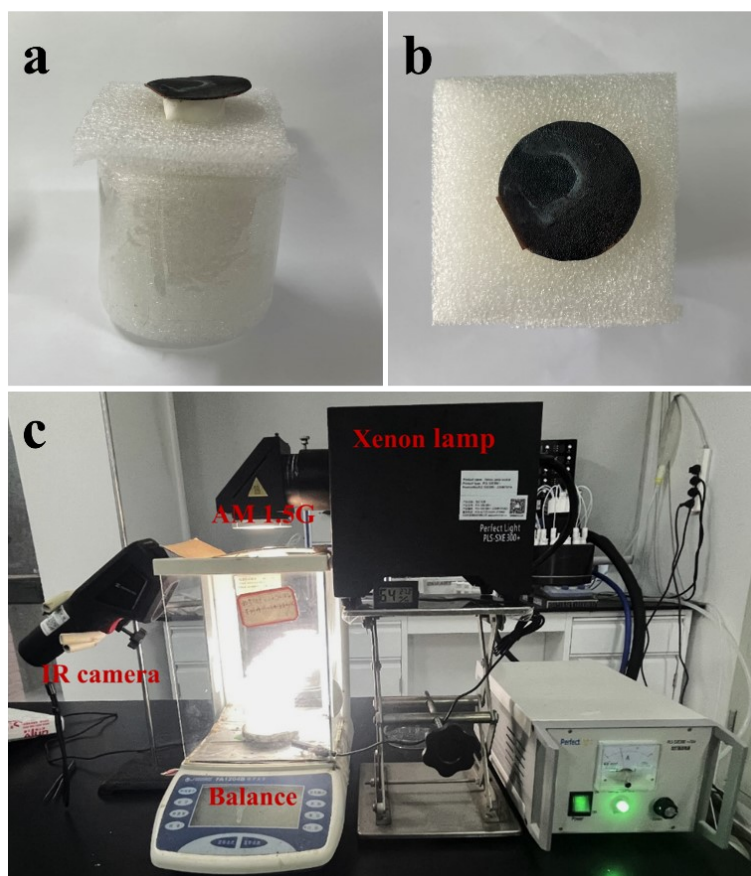

**Figure S15.** (a) The cross-sectional-view and (b) top-view photographs of the device, (c) Photograph for the device for recording the water mass change under solar irradiation. Under 1-sun ( $1 \text{ kW} \cdot \text{m}^{-2}$ ) exposure in air, this simulation device was setup to monitor the changes in water weight over time.

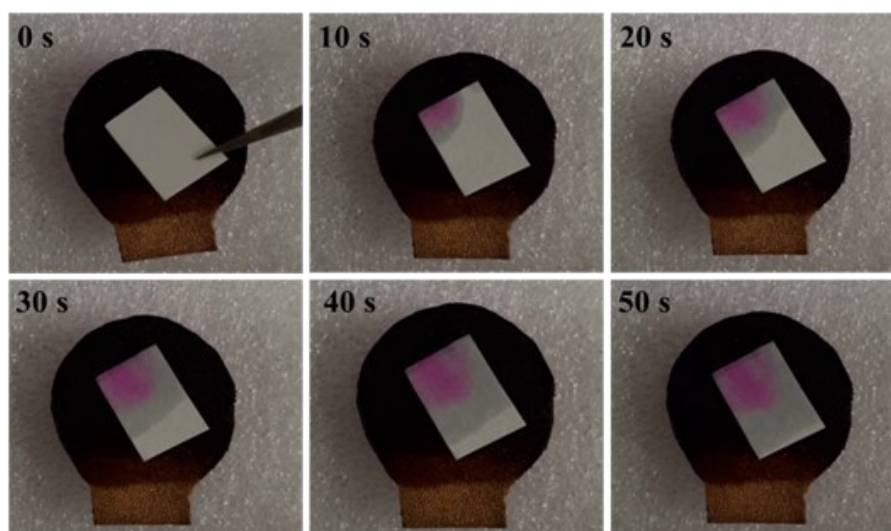

**Figure S16.** Dye solution absorption capacity of PFC-771/Cu film.

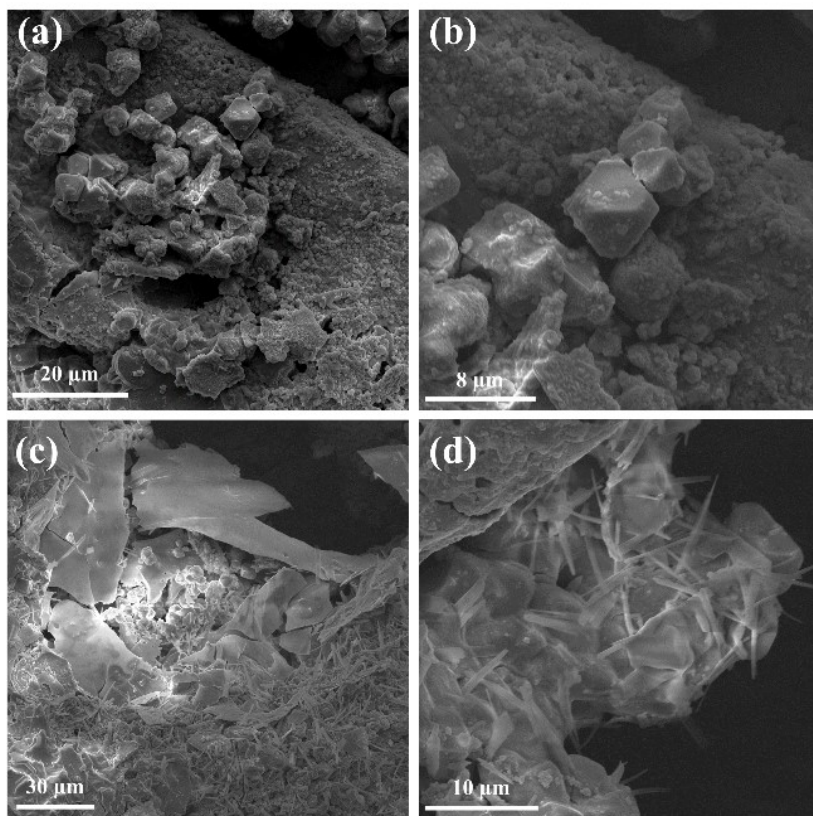

**Figure S17.** SEM images of PFC-771/Cu film after 14h evaporation.

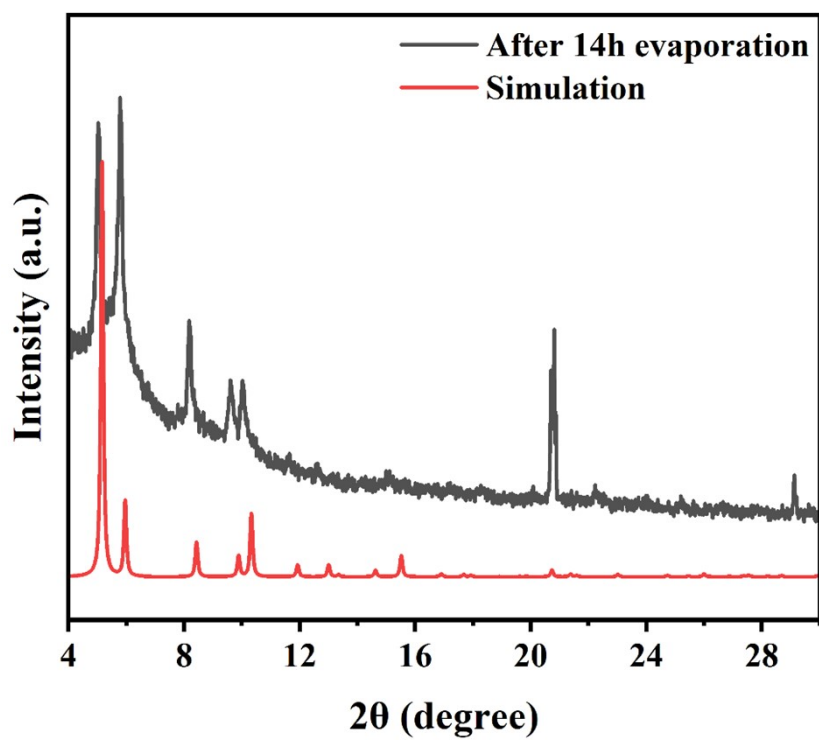

**Figure S18.** The PXRD pattern of PFC-771 after 14h evaporation.

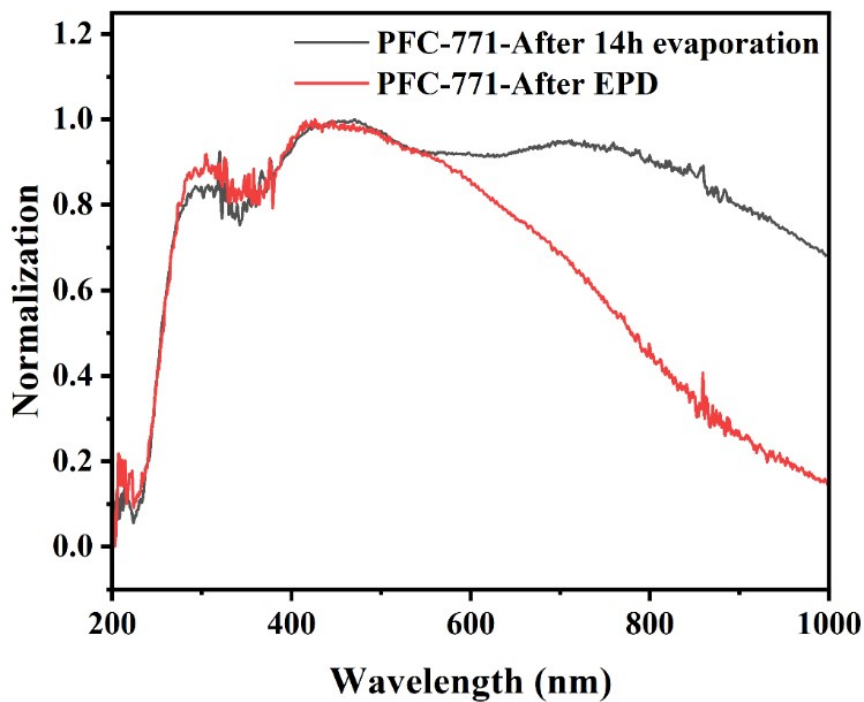

Figure S19. UV-Vis DRS of PFC-771 after 14h evaporation.

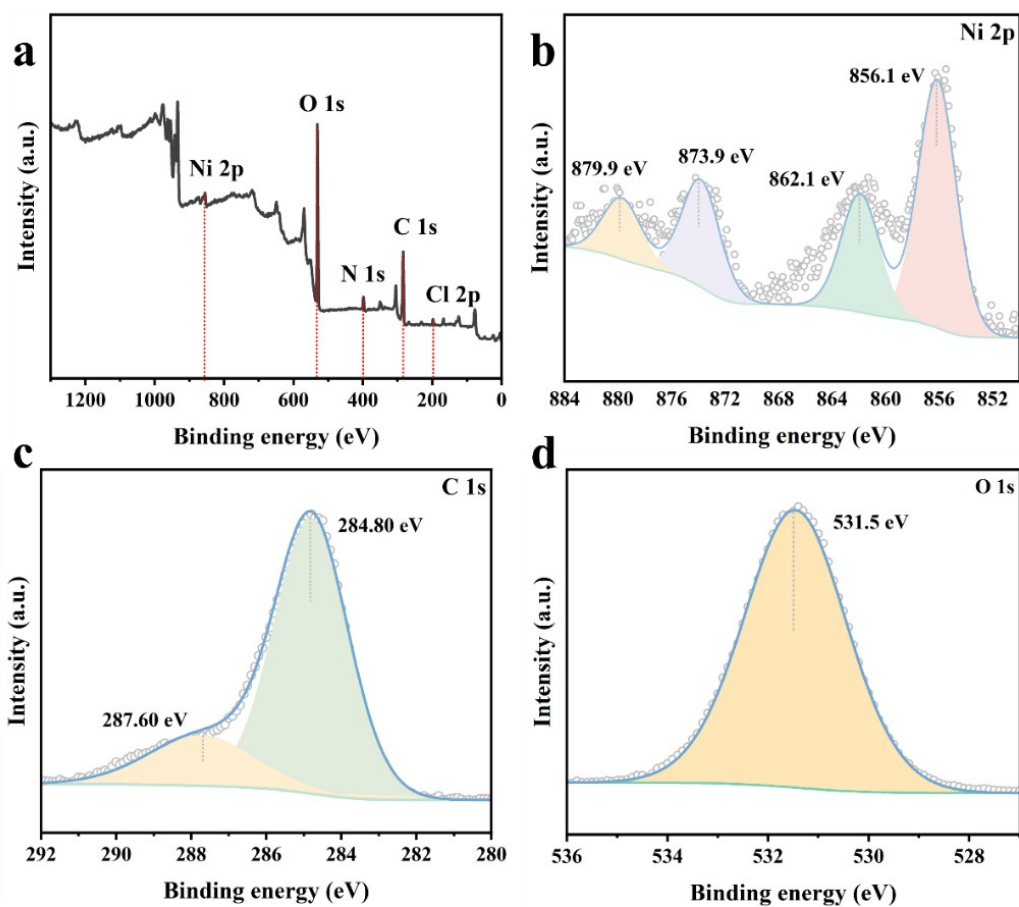

Figure S20. A full view of the XPS spectrum after 14h evaporation (a) of PFC-771. (b) the close-ups for Ni 2p peaks. (c) C 1s peaks and (d) O 1s peaks.

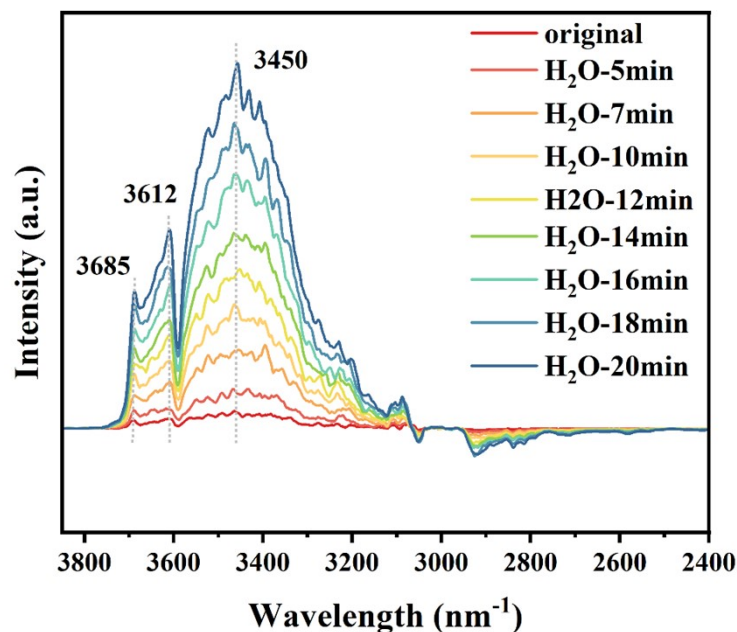

**Figure S21.** In situ FTIR spectra of H<sub>2</sub>O absorbed in PFC-771 in the atmosphere of H<sub>2</sub>O at 373K.

**Table S1.** Comparison of solar steam generation performance from literature reported polymers under one sun illumination.

| Materials            | Evaporation rate (kg·m <sup>-2</sup> ·h <sup>-1</sup> ) | Efficiency (%) | Reference                                                      |
|----------------------|---------------------------------------------------------|----------------|----------------------------------------------------------------|
| PFC-771/Cu foam      | 1.33                                                    | 91.08          | <b>This work</b>                                               |
| Ppy/Alg hydrogel     | 1.15                                                    | 54.1           | Desalination 500 (2021) 114900 <sup>4</sup>                    |
| CG@MPT-h sponges     | 1.13                                                    | 78.9           | ACS Appl. Mater. Interfaces 2021, 13, 10902–10915 <sup>5</sup> |
| CR-TPE-T             | 1.272                                                   | 87.2           | Adv. Mater. 2020, 1908537 <sup>6</sup>                         |
| GT-COF-3-loaded foam | 1.314                                                   | 90.7           | CCS Chem. 2021, 3, 2926 <sup>7</sup>                           |
| Polymer foam         | 1.17                                                    | 80.5           | Chem. Sci., 2018, 9, 623 <sup>8</sup>                          |
| CNT@PEI/MCE          | 5.07                                                    | 72.0           | J. Mater. Chem. A, 2019, 7, 704–710 <sup>9</sup>               |
| MDPC/SS mesh         | 1.222                                                   | 84.3           | Sol. Energy Mater Sol. Cells. 2019, 196, 36–42 <sup>10</sup>   |

## S7 Calculation.

### Supplementary Note 1: Calculation of the efficiency for solar vapor generation

The thermal efficiency ( $\eta$ ) is considered to assess the performance of PFC-771/Cu film and is defined as<sup>11</sup>

$$\eta = \frac{\dot{m}h_{LV}}{C_{opt}P_0} \quad (S5)$$

where  $\dot{m}$  denotes the mass flux,  $C_{opt}$  the optical concentration and  $P_0$  the nominal direct solar irradiation  $1 \text{ kW}\cdot\text{m}^2$ ,  $h_{LV}$  refers to total enthalpy of liquid–vapour phase change [i.e., sensible heat and vaporization enthalpy ( $h_{LV} = Q + \Delta h_{vap}$ )]. The schematic diagram of the vaporization enthalpy of steam is as follows:

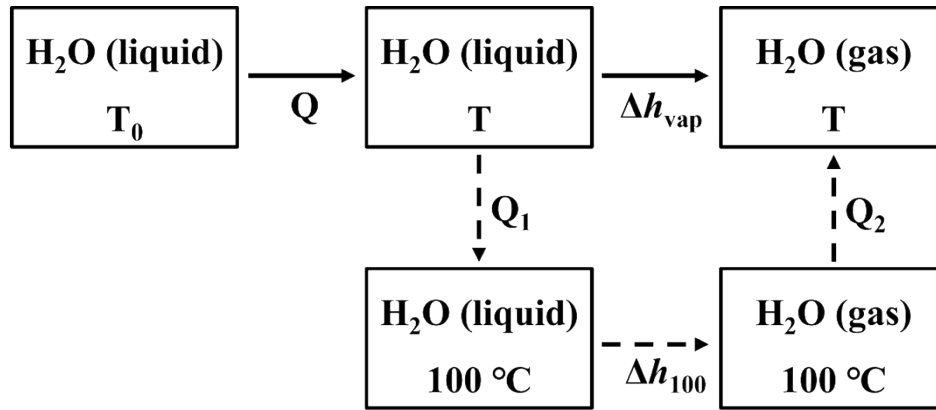

$$Q = C_{\text{liquid}} \times (T - T_0) \quad (S6)$$

$$\Delta h_{\text{vap}} = Q_1 + \Delta h_{100} + Q_2 \quad (S7)$$

$$Q_1 = C_{\text{liquid}} \times (100 - T) \quad (S8)$$

$$Q_2 = C_{\text{gas}} \times (T - 100) \quad (S9)$$

In this work,  $C_{\text{liquid}}$ , the specific heat capacity of liquid water is a constant of  $4.18 \text{ J}\cdot\text{g}^{-1}\cdot\text{°C}^{-1}$ .  $C_{\text{gas}}$ , the specific heat capacity of water vapor is a constant of  $1.865 \text{ J}\cdot\text{g}^{-1}\cdot\text{°C}^{-1}$ .  $\Delta h_{100}$  is the latent heat of vaporization of water at  $100\text{°C}$ , taken to be  $2260 \text{ kJ}\cdot\text{kg}^{-1}$

For example, the surface temperature of PFC-771/Cu film was  $42.1\text{°C}$  during the evaporation process, therefore  $T$  is  $37.6\text{°C}$ . According to the above formula,

$$Q = 4.18 \times (42.1 - 25) = 71.478 \text{ kJ}\cdot\text{kg}^{-1}$$

$$\Delta h_{100} = 4.18 \times (100 - 42.1) + 2260 + 1.865 \times (42.1 - 100) = 2394.039 \text{ kJ}\cdot\text{kg}^{-1}$$

$$h_{LV} = Q + \Delta h_{\text{vap}} = 71.478 + 2394.039 = 2465.517 \text{ kJ}\cdot\text{kg}^{-1}$$

$$\dot{m} = 1.33 \text{ kg}\cdot\text{m}^{-2}\cdot\text{h}^{-1}$$

$$P_0 = 1 \text{ kW}\cdot\text{m}^{-2}$$

$$C_{\text{opt}} = 1$$



$$\eta = \frac{\dot{m}h_{LV}}{C_{opt}P_0} = \frac{1.33 \times 2465.517}{3600} \times 100\% = 91.08\%$$

As a result, evaporation efficiency  $\eta = 91.08\%$  when the latent heat of water vaporization at  $42.1^\circ\text{C}$  is used in calculation.

**Table S2** The evaporation rate and efficiency corresponding to different amounts of PFC-771.

| $m/m_0$ | T (K) | $T_0$ (K) | $h_{LV}$<br>(kJ·kg <sup>-1</sup> ) | $\dot{m}$<br>(kg·m <sup>-2</sup> ·h <sup>-1</sup> ) | $\eta$ (%) |
|---------|-------|-----------|------------------------------------|-----------------------------------------------------|------------|
| 2.92%   | 308   | 303       | 2430.63                            | 0.925                                               | 62.48      |
| 3.73%   | 309   | 303       | 2431.75                            | 1.094                                               | 73.89      |
| 4.46%   | 311   | 306       | 2436.97                            | 1.185                                               | 79.80      |

**Table S3** Evaporation rate and efficiency

| Evaporator | T (K) | $T_0$ (K) | $h_{LV}$<br>(kJ·kg <sup>-1</sup> ) | $\dot{m}$<br>(kg·m <sup>-2</sup> ·h <sup>-1</sup> ) | $\eta$ (%) |
|------------|-------|-----------|------------------------------------|-----------------------------------------------------|------------|
| PFC-771/Cu | 310.6 | 298       | 2465.51                            | 1.333                                               | 91.08      |
| Cu foam    | 299   | 290       | 2456.39                            | 0.298                                               | 20.34      |
| Bulk water | 301   | 290       | 2437.36                            | 0.356                                               | 24.29      |

### Supplementary Note 2: Calculation of heat loss<sup>12</sup>

The calculation process for the light intensity of  $1 \text{ kW}\cdot\text{m}^{-2}$  is shown as an example. The solar energy absorbed by a PFC-771/Cu film solar evaporator ( $Q_{in}$ ) can be calculated by

$$Q_{in} = S \times q_i \times t \quad (\text{S11})$$

where  $S$  is the projection area of the evaporator ( $d=1.5 \text{ cm}$ ),  $q_i$  is the light intensity and  $t$  is the time of illumination.

The heat loss ( $\eta_{hl}$ ) mainly consists of radiation loss, convection loss and conduction loss.

#### 1. Radiation loss

The radiation loss ( $\eta_{rad}$ ) can be calculated by

$$\eta_{rad} = \frac{S\varepsilon\sigma(T_1^4 - T_0^4)}{S \times q_i} = \frac{\varepsilon\sigma(T_1^4 - T_0^4)}{q_i} \quad (\text{S12})$$

where  $S$  is the projected area of the evaporator ( $d=1.5$  cm),  $\varepsilon$  is the emissivity (about 0.84),  $\sigma$  is the Boltzmann constant ( $5.67 \times 10^{-8} \text{ W}\cdot\text{m}^{-2}\cdot\text{K}^{-4}$ ),  $T_1$  is the temperature of the evaporator surface, and  $T_0$  is the ambient temperature. In our work, at a light intensity of  $1 \text{ kW m}^{-2}$ ,  $T_1=315.1$  K and  $T_0 = 298$  K, so  $\eta_{rad}=9.3\%$

## 2. Convection loss

The convection loss ( $\eta_{conv}$ ) can be calculated according to

$$\eta_{conv} = \frac{Sh(T_1 - T_0)}{S \times q_i} = \frac{h(T_1 - T_0)}{q_i} \quad (\text{S13})$$

where  $S$  is the projected area of the evaporator ( $d=1.5$  cm),  $h$  is the convective heat transfer coefficient ( $5 \text{ W}\cdot\text{m}^{-2}\cdot\text{K}^{-1}$ ),  $T_1$  is the surface temperature of the evaporator, and  $T_0$  is the ambient temperature. In our work, at a light intensity of  $1 \text{ kW}\cdot\text{m}^{-2}$ ,  $T_1 = 313.45$  K and  $T_0 = 298.65$  K, so  $\eta_{conv}= 8.5\%$ .

## 3. Conduction loss

We employ a 1D water transport pathway to isolate the solar absorber from with the water, so the conduction loss can be ignored.

In summary, at a light intensity of  $1 \text{ kW}\cdot\text{m}^{-2}$ , the total heat loss  $\eta_{ht}=17.8\%$ .

## Supplementary Note 3: Calculation of the water evaporation enthalpy

The energy for water evaporation in dark is obtained from the environment, which is thereby same for different evaporators, according to the previous work<sup>13</sup>. Considering the known theoretical evaporation enthalpy value of liquid water (ca.  $2430 \text{ kJ}\cdot\text{kg}^{-1}$ ), the water evaporation enthalpy values of the PCF-771/Cu film evaporator are calculated by the following formula,

$$U_{in} = E_{equ}M_g = E_0M_0 \quad (\text{S10})$$

where  $U_{in}$  is the total energy absorbed from the environment per hour;  $E_0$  refers to the water evaporation enthalpy ( $2430 \text{ kJ}\cdot\text{kg}^{-1}$ ),  $M_0$  refers to the water mass loss (g) in 1 h of evaporation system without evaporators in the darkness, respectively;  $M_g$  means the water mass loss (g) of evaporation system with the evaporator;  $E_{equ}$  is the equivalent evaporation enthalpy of the corresponding system.

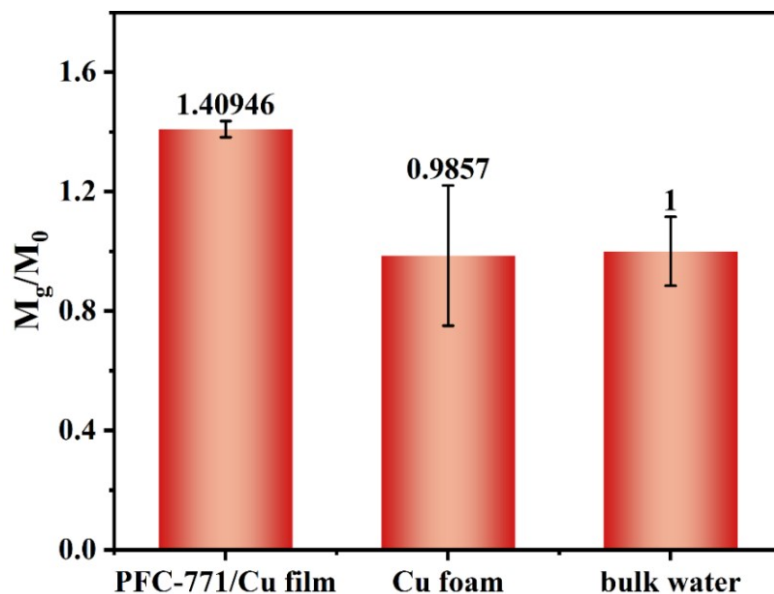

**Figure S22.** The ratio between  $M_g$  and  $M_0$ .

In the darkness, the  $M_g/M_0$  loss of bulk water, bare Cu foam, and PFC-771/Cu film is 1, 0.98, and 1.41, respectively. Hence, the water evaporation enthalpy of the bare Cu foam and PFC-771/Cu film is calculated to be  $2465 \text{ kJ}\cdot\text{kg}^{-1}$  and  $1724 \text{ kJ}\cdot\text{kg}^{-1}$ , respectively, which is lower than that of the bulk water ( $2430 \text{ kJ}\cdot\text{kg}^{-1}$ ). The evaporation enthalpy estimated by the evaporation process in a dark environment ( $1724 \text{ kJ}\cdot\text{kg}^{-1}$ ) shows the similar trend, but lower than that obtained through the DSC method ( $2184.37 \text{ kJ}\cdot\text{kg}^{-1}$ ). The reason can be attributed to the fact that DSC measures the process of completely dehydration, whereas actual solar water evaporation involves partial dehydration.

**Table S4.** Comparison of energy consumption estimated from DSC measurement and dark experiment.

| Energy consumption( $\text{kJ}\cdot\text{kg}^{-1}$ ) | PFC-771/Cu | Cu foam | Bulk water |
|------------------------------------------------------|------------|---------|------------|
| DSC measurement                                      | 2184.37    | 2294.19 | 2206.60    |
| Dark experiment                                      | 1724       | 2465    | 2430       |

## References :

1. S. N. Sun, L. Z. Dong, J. R. Li, J. W. Shi, J. Liu, Y. R. Wang, Q. Huang and Y. Q. Lan, *Angew. Chem. Int. Ed.* 2022, **61**, e202207282.
2. Q. Chen, S. Li, H. Xu, G. Wang, Y. Qu, P. Zhu and D. Wang, , *Chinese J. Catal*, 2020, **41**, 514-523.
3. M. Zheng, Y. Ding, L. Yu, X. Du and Y. Zhao, *Adv. Funct. Mater*, 2017, **27**, 1605846.
4. S. H. Park, J. H. Park, J. Kim and S. J. Lee, *Desalination*, 2021, **500**, 114900.
5. X. Wang, Z. Li, Y. Wu, H. Guo, X. Zhang, Y. Yang, H. Mu and J. Duan, *Appl. Mater. Interfaces* 2021, **13**, 10902–10915.
6. G. Chen, J. Sun, Q. Peng, Q. Sun, G. Wang, Y. Cai, X. Gu, Z. Shuai and B. Z. Tang, *Adv. Mater.* 2020, 1908537.
7. X. Tang, Z. Chen, Q. Xu, Y. Su, H. Xu, S. Horike, H. Zhang, Y. Li and C. Gu, *CCS Chem.* 2021, **3**, 2926.
8. Q. Chen, Z. Pei, Y. Xu, Z. Li, Y. Yang, Y. Wei and Y. Ji, *Chem. Sci.*, 2018, **9**, 6238.
9. Y. Li, X. Cui, M. Zhao, Y. Xu, L. Chen, Z. Cao, S. Yang and Y. Wang, *J. Mater. Chem. A*, 2019, **7**, 704–7109.
10. S. Ma, W. Qarony, M. I. Hossain, C. T. Yip and Y. H. Tsang, *Sol. Energy Mater Sol. Cells.* 2019, **196**, 36–4210.
11. X. Ye, L.-H. Chung, K. Li, S. Zheng, Y.-L. Wong, Z. Feng, Y. He, D. Chu, Z. Xu, L. Yu and J. He, *Nat. Commun*, 2022, **13**, 1-8.
12. Q. Yongqiang, X. Guanfeng, C. Luzhuo, X. Gang and E. W. Guan, *Adv. Mater*, 2023, **36**, 2310795.
13. X. Zhou, Y. Guo, F. Zhao, W. Shi and G. Yu, *Adv. Mater*, 2020, **32**, 2007012.
